# Supplementary material for: Comprehensive Analysis of CXCR4, JUNB, and PD-L1 Expression in Circulating Tumor Cells (CTCs) from Prostate Cancer Patients
Source: MDPI journal article supplement (doi:10.3390/cells13090782), 2024-05-03
Supplement: s1 [file s1]

Supplementary Figure S1

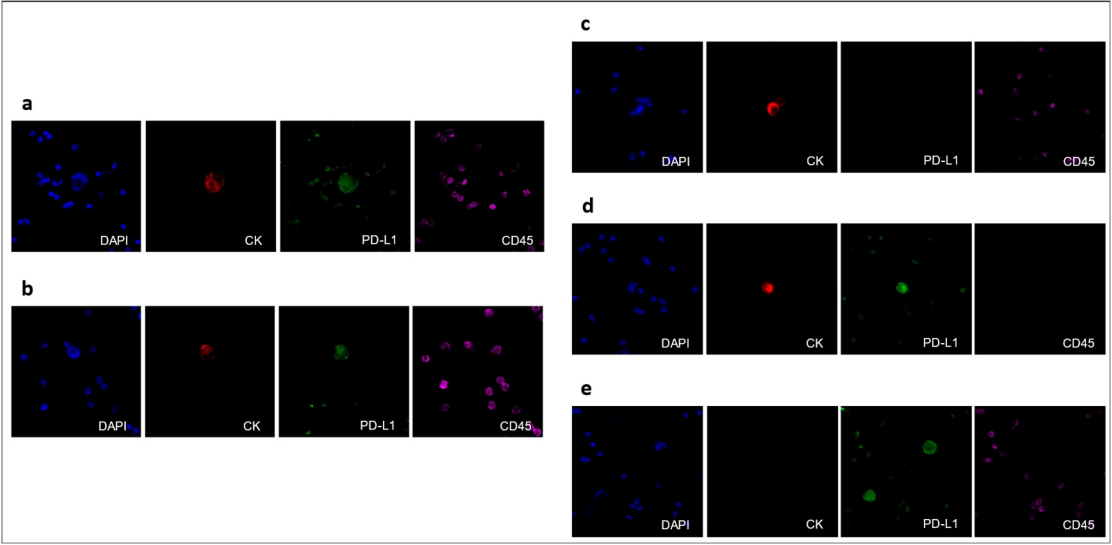

Supplementary Figure S2

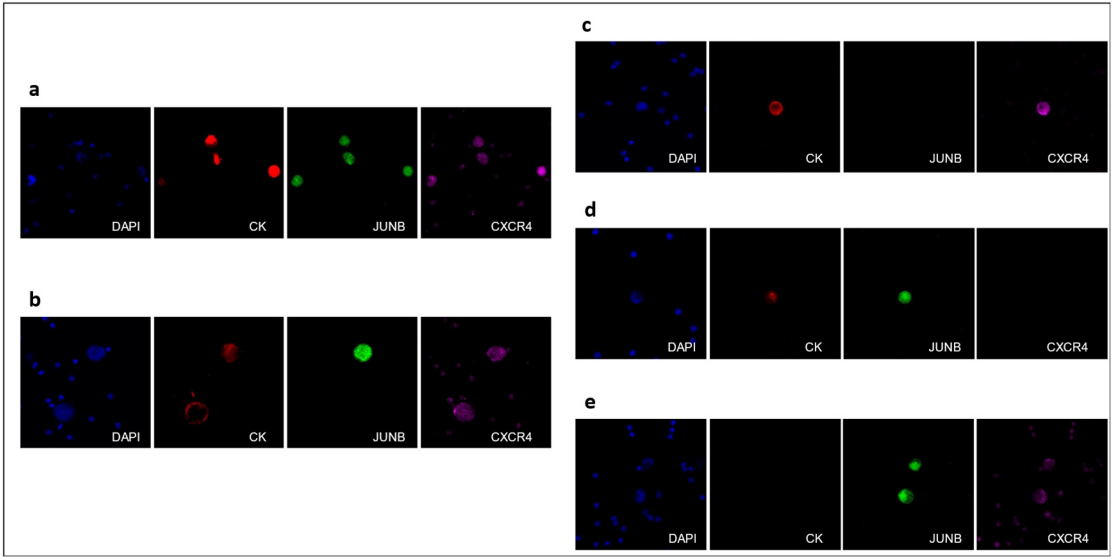

Supplementary Figure S3

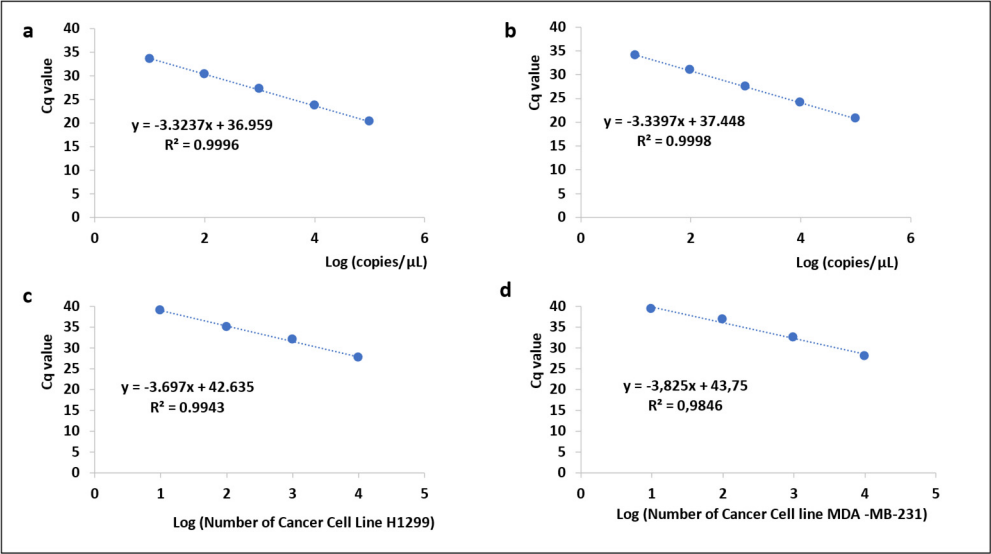

Supplementary Figure S4

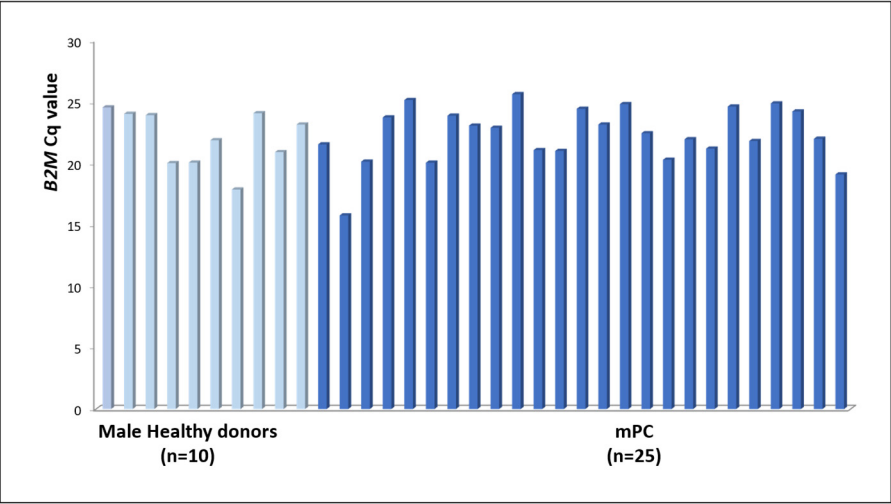

Supplementary Figure S5a

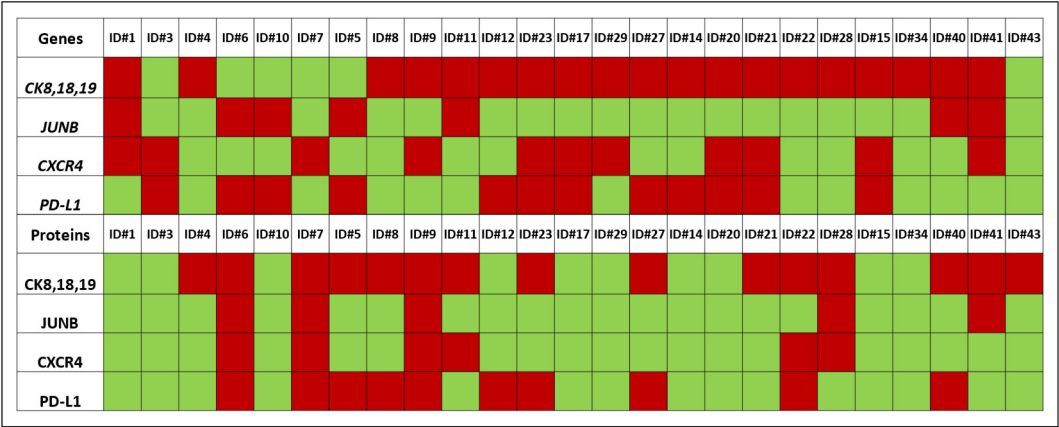

Supplementary Figure S5b

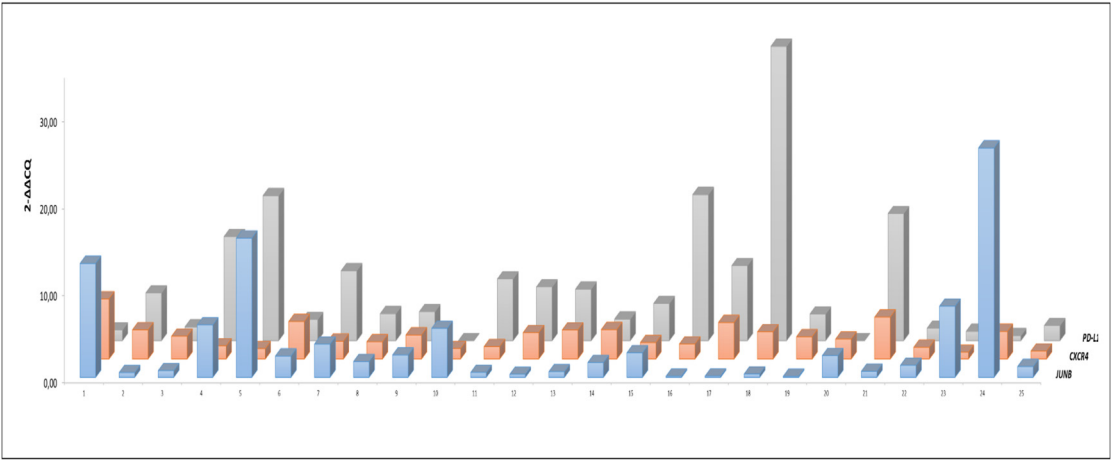

Table S1. Patients' characteristics enrolled in Ficoll density isolation (48 patients).

| Variable | Sub-categories<br>n (%) |
|----------|-------------------------|
| Age      |                         |
| ≥ 75     | 20 (41.7 %)             |
| < 75     | 13 (27.1 %)             |
| Unknown  | 15 (31.2 %)             |

|                                  |                |
|----------------------------------|----------------|
| <b>Gleason score, n (%)</b>      |                |
| ≥ 8                              | 24 (50 %)      |
| < 8                              | 14 (29.2 %)    |
| Unknown                          | 10 (20.8 %)    |
| <b>Mean PSA (Range), (ng/mL)</b> |                |
|                                  | 89.9 (1.6-342) |
| <b>Smoking Consumption</b>       |                |
| Yes                              | 13 (27.1 %)    |
| No                               | 27 (56.2 %)    |
| Unknown                          | 8 (16.7 %)     |
| <b>Disease stage</b>             |                |
| Metastatic                       | 48 (100.0 %)   |
| <b>Metastasis locations</b>      |                |
| Bone metastasis                  | 19 (39.6 %)    |
| Lymph node metastasis            | 12 (25.0 %)    |
| Lung metastasis                  | 4 (8.33 %)     |
| Bone marrow metastasis           | 1 (2.1 %)      |
| Kidney metastasis                | 1 (2.1 %)      |
| Unknown                          | 11 (22.9 %)    |
| <b>Chemotherapy</b>              |                |
| Baseline                         | 38 (79.2 %)    |
| After 1 <sup>st</sup> line       | 10 (20.8 %)    |

**Table S2. Patients' characteristics enrolled in mRNA analysis (25 patients).**

| <b>Variable</b>             | <b>Sub-categories<br/>n (%)</b> |
|-----------------------------|---------------------------------|
| <b>Age</b>                  |                                 |
| ≥ 75                        | 8 (32.0 %)                      |
| < 75                        | 8 (32.0 %)                      |
| Unknown                     | 9 (36.0 %)                      |
| <b>Gleason score, n (%)</b> |                                 |
| ≥ 8                         | 12 (48.0 %)                     |

|                                  |              |
|----------------------------------|--------------|
| < 8                              | 7 (28.0 %)   |
| Unknown                          | 6 (24.0 %)   |
| <b>Mean PSA (Range), (ng/mL)</b> | 65.4 (2-251) |
| <b>Smoking Consumption</b>       |              |
| Yes                              | 4 (16.0 %)   |
| No                               | 16 (64.0 %)  |
| Unknown                          | 5 (20.0 %)   |
| <b>Disease stage</b>             |              |
| Metastatic                       | 25 (100.0 %) |
| <b>Metastasis locations</b>      |              |
| Bone metastasis                  | 8 (32.0 %)   |
| Lymph node metastasis            | 9 (36.0 %)   |
| Lung metastasis                  | 1 (4.0 %)    |
| Bone marrow metastasis           | 1 (4.0 %)    |
| Kidney metastasis                | 1 (4.0 %)    |
| Unknown                          | 5 (20.0 %)   |
| <b>Chemotherapy</b>              |              |
| Baseline                         | 25 (100.0 %) |
| After 1 <sup>st</sup> line       | 0 (0 %)      |

**Table S3. Patients' characteristics enrolled in ISET isolation (17 patients).**

| <b>Variable</b>             | <b>Sub-categories<br/>n (%)</b> |
|-----------------------------|---------------------------------|
| <b>Age</b>                  |                                 |
| ≥ 75                        | 7 (41.2 %)                      |
| < 75                        | 8 (47.0 %)                      |
| Unknown                     | 2 (11.8 %)                      |
| <b>Gleason score, n (%)</b> |                                 |
| ≥ 8                         | 6 (35.3 %)                      |
| < 8                         | 5 (29.4 %)                      |
| Unknown                     | 6 (35.3 %)                      |

|                                  |                |
|----------------------------------|----------------|
| <b>Mean PSA (Range), (ng/mL)</b> | 95.2 (7.9-251) |
| <b>Smoking Consumption</b>       |                |
| Yes                              | 6 (35.3 %)     |
| No                               | 7 (41.2 %)     |
| Unknown                          | 4 (23.5 %)     |
| <b>Disease stage</b>             |                |
| Metastatic                       | 17 (100.0 %)   |
| <b>Metastasis locations</b>      |                |
| Bone metastasis                  | 9 (52.9 %)     |
| Lymph node metastasis            | 6 (35.3 %)     |
| Lung metastasis                  | 2 (11.8%)      |
| Bone marrow metastasis           | 0 (0 %)        |
| Kidney metastasis                | 0 (0 %)        |
| Unknown                          | 0 (0 %)        |
| <b>Chemotherapy</b>              |                |
| Baseline                         | 17 (100.0 %)   |
| After 1 <sup>st</sup> line       | 0 (0 %)        |

**Table S4. CTCs per patient after ficoll density gradient isolation and triple immunofluorescent staining CK/PD-L1/CD45.**

| <b>Patient ID#number</b> | <b>Total CK+ cells (CTCs)</b> | <b>CK+/PD-L1+/CD45-</b> | <b>CK+/PD-L1-/CD45-</b> |
|--------------------------|-------------------------------|-------------------------|-------------------------|
| 1                        | 0                             | 0                       | 0                       |
| 2                        | 1                             | 1                       | 0                       |
| 3                        | 0                             | 0                       | 0                       |
| 4                        | 1                             | 0                       | 1                       |
| 5                        | 5                             | 5                       | 0                       |
| 6                        | 6                             | 0                       | 6                       |
| 7                        | 1                             | 1                       | 0                       |
| 8                        | 2                             | 2                       | 0                       |
| 9                        | 0                             | 0                       | 0                       |

|    |   |   |   |
|----|---|---|---|
| 10 | 0 | 0 | 0 |
| 11 | 0 | 0 | 0 |
| 12 | 0 | 0 | 0 |
| 13 | 0 | 0 | 0 |
| 14 | 0 | 0 | 0 |
| 15 | 0 | 0 | 0 |
| 16 | 1 | 1 | 0 |
| 17 | 0 | 0 | 0 |
| 18 | 0 | 0 | 0 |
| 19 | 0 | 0 | 0 |
| 20 | 0 | 0 | 0 |
| 21 | 1 | 0 | 1 |
| 22 | 1 | 1 | 0 |
| 23 | 2 | 2 | 0 |
| 24 | 1 | 1 | 0 |
| 25 | 3 | 3 | 0 |
| 26 | 0 | 0 | 0 |
| 27 | 1 | 1 | 0 |
| 28 | 2 | 0 | 2 |
| 29 | 0 | 0 | 0 |
| 30 | 0 | 0 | 0 |
| 31 | 0 | 0 | 0 |
| 32 | 0 | 0 | 0 |
| 33 | 0 | 0 | 0 |
| 34 | 0 | 0 | 0 |
| 35 | 0 | 0 | 0 |
| 36 | 0 | 0 | 0 |
| 37 | 0 | 0 | 0 |
| 38 | 0 | 0 | 0 |
| 39 | 0 | 0 | 0 |
| 40 | 1 | 1 | 0 |
| 41 | 0 | 0 | 0 |
| 42 | 1 | 0 | 1 |
| 43 | 1 | 0 | 1 |
| 44 | 0 | 0 | 0 |
| 45 | 1 | 0 | 1 |
| 46 | 0 | 0 | 0 |

|    |   |   |   |
|----|---|---|---|
| 47 | 0 | 0 | 0 |
| 48 | 0 | 0 | 0 |

**Table S5. Wilcoxon signed-rank test results for the identified phenotypes from triple immunofluorescence stainings.**

|                        | CK+/PD-L1+/CD45- vs CK+/PD-L1-/CD45- | ISET_CK+/PD-L1+/CD45- vs ISET_CK+/PD-L1-/CD45- | CK+/CXCR4+ vs CK+/JUNB+ | CK+/CX CR4+/JU NB+ vs CK+/CX CR4-/JUNB+ | CK+/CX CR4+/JU NB+ vs CK+/CX CR4+/JU NB- | CK+/CX CR4+/JU NB+ vs CK+/CX CR4-/JUNB- | CK+/CX CR4+/JU NB- vs CK+/CX CR4-/JUNB+ | CK+/CX CR4-/JUNB+ vs CK+/CX CR4-/JUNB- |
|------------------------|--------------------------------------|------------------------------------------------|-------------------------|-----------------------------------------|------------------------------------------|-----------------------------------------|-----------------------------------------|----------------------------------------|
| Asymp. Sig. (2-tailed) | 0.343                                | 0.861                                          | 0.518                   | 0.013                                   | 0.083                                    | 0.077                                   | 0.518                                   | 0.336                                  |

**Table S6. CTCs per patients after ISET isolation and triple immunofluorescent staining CK/PD-L1/CD45.**

| Patient ID#number | Total CK+ cells (CTCs) | CK+/PD-L1+/CD45- | CK+/PD-L1-/CD45- |
|-------------------|------------------------|------------------|------------------|
| 5                 | 2                      | 1                | 1                |
| 6                 | 1                      | 1                | 0                |
| 7                 | 3                      | 1                | 2                |
| 8                 | 97                     | 0                | 97               |
| 9                 | 1                      | 1                | 0                |
| 10                | 0                      | 0                | 0                |
| 11                | 0                      | 0                | 0                |
| 12                | 1                      | 1                | 0                |
| 13                | 0                      | 0                | 0                |
| 14                | 0                      | 0                | 0                |
| 16                | 0                      | 0                | 0                |
| 22                | 0                      | 0                | 0                |
| 23                | 14                     | 8                | 6                |
| 24                | 1                      | 0                | 1                |
| 26                | 0                      | 0                | 0                |
| 36                | 0                      | 0                | 0                |
| 41                | 0                      | 0                | 0                |



**Table S7. CTCs per patient after ficoll density gradient isolation and triple immunofluorescent staining CK/CXCR4/JUNB.**

| <b>Patient ID#number</b> | <b>Total CK+ cells (CTCs)</b> | <b>CK+/CXCR 4+/JUNB+</b> | <b>CK+/CXCR 4-/JUNB+</b> | <b>CK+/CXCR 4+/JUNB-</b> | <b>CK+/CXCR 4-/JUNB-</b> |
|--------------------------|-------------------------------|--------------------------|--------------------------|--------------------------|--------------------------|
| 1                        | 0                             | 0                        | 0                        | 0                        | 0                        |
| 2                        | 1                             | 1                        | 0                        | 0                        | 0                        |
| 3                        | 0                             | 0                        | 0                        | 0                        | 0                        |
| 4                        | 3                             | 0                        | 0                        | 0                        | 3                        |
| 5                        | 0                             | 0                        | 0                        | 0                        | 0                        |
| 6                        | 16                            | 8                        | 3                        | 2                        | 3                        |
| 7                        | 5                             | 2                        | 0                        | 3                        | 0                        |
| 8                        | 0                             | 0                        | 0                        | 0                        | 0                        |
| 9                        | 1                             | 1                        | 0                        | 0                        | 0                        |
| 10                       | 0                             | 0                        | 0                        | 0                        | 0                        |
| 11                       | 2                             | 0                        | 0                        | 2                        | 0                        |
| 12                       | 0                             | 0                        | 0                        | 0                        | 0                        |
| 13                       | 1                             | 1                        | 0                        | 0                        | 0                        |
| 14                       | 0                             | 0                        | 0                        | 0                        | 0                        |
| 15                       | 0                             | 0                        | 0                        | 0                        | 0                        |
| 16                       | 2                             | 2                        | 0                        | 0                        | 0                        |
| 17                       | 0                             | 0                        | 0                        | 0                        | 0                        |
| 18                       | 0                             | 0                        | 0                        | 0                        | 0                        |
| 19                       | 0                             | 0                        | 0                        | 0                        | 0                        |
| 20                       | 0                             | 0                        | 0                        | 0                        | 0                        |
| 21                       | 0                             | 0                        | 0                        | 0                        | 0                        |
| 22                       | 1                             | 0                        | 0                        | 1                        | 0                        |
| 23                       | 0                             | 0                        | 0                        | 0                        | 0                        |
| 24                       | 1                             | 1                        | 0                        | 0                        | 0                        |
| 25                       | 2                             | 2                        | 0                        | 0                        | 0                        |
| 26                       | 0                             | 0                        | 0                        | 0                        | 0                        |
| 27                       | 0                             | 0                        | 0                        | 0                        | 0                        |
| 28                       | 4                             | 2                        | 0                        | 0                        | 2                        |
| 29                       | 0                             | 0                        | 0                        | 0                        | 0                        |
| 30                       | 1                             | 1                        | 0                        | 0                        | 0                        |
| 31                       | 0                             | 0                        | 0                        | 0                        | 0                        |

|    |   |   |   |   |   |
|----|---|---|---|---|---|
| 32 | 0 | 0 | 0 | 0 | 0 |
| 33 | 1 | 0 | 1 | 0 | 0 |
| 34 | 0 | 0 | 0 | 0 | 0 |
| 35 | 0 | 0 | 0 | 0 | 0 |
| 36 | 0 | 0 | 0 | 0 | 0 |
| 37 | 0 | 0 | 0 | 0 | 0 |
| 38 | 0 | 0 | 0 | 0 | 0 |
| 39 | 0 | 0 | 0 | 0 | 0 |
| 40 | 1 | 0 | 0 | 0 | 1 |
| 41 | 1 | 0 | 1 | 0 | 0 |
| 42 | 0 | 0 | 0 | 0 | 0 |
| 43 | 0 | 0 | 0 | 0 | 0 |
| 44 | 0 | 0 | 0 | 0 | 0 |
| 45 | 0 | 0 | 0 | 0 | 0 |
| 46 | 0 | 0 | 0 | 0 | 0 |
| 47 | 0 | 0 | 0 | 0 | 0 |
| 48 | 0 | 0 | 0 | 0 | 0 |
